# Supplementary material for: Acid–base machines: electrical work from neutralization reactions
Source: Royal Society of Chemistry journal article supplement (doi:10.1039/c7cp05362b), 2017-01-01
Supplement: c7cp05362b1.pdf [file c7cp05362b1.pdf]

# Acid-Base Machine: Electrical Work from Neutralization Reactions

Gilberto Lima, William G. Morais, Wellington J. A. S. Gomes, and Fritz Huguenin\*

<sup>1</sup>Departamento de Química, Faculdade de Filosofia, Ciências e Letras de Ribeirão Preto – Universidade  
de São Paulo, 14040-901 Ribeirão Preto (SP), Brazil

Keywords: Prussian blue analogue, polycyanometallate, polyoxometalate, sodium ion insertion, proton  
insertion, neutralization pseudocapacitors.

## SUPPLEMENTARY INFORMATION

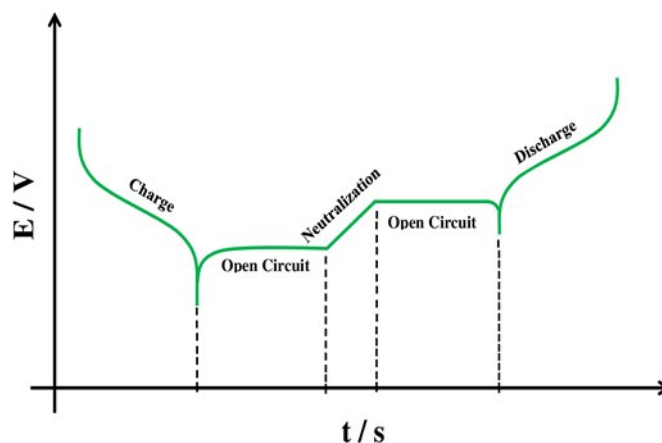

Figure 1s – Schematic representation of the experimental setup related to the charge (non-spontaneous) and discharge (spontaneous) steps of the full cell. The charge step of the full cell was performed in 20 mL of an electrolytic solution with HCl at pH = 1.1 and NaCl at pNa = 2. After that, the initial solution was exchanged for solutions composed of HCl, CH<sub>3</sub>COOH, and NaOH at different proportions to simulate neutralization with the addition of NaOH. The discharge process was performed in solutions at pH = 2, 3, 4, 5, and 6 and pNa = 1.1. The electrochemical experiments were carried out in a homemade electrochemical cell containing two connections for input and output of the electrolytic solution; the solutions were exchanged by means of a four-channel peristaltic pump model BT100-1F.

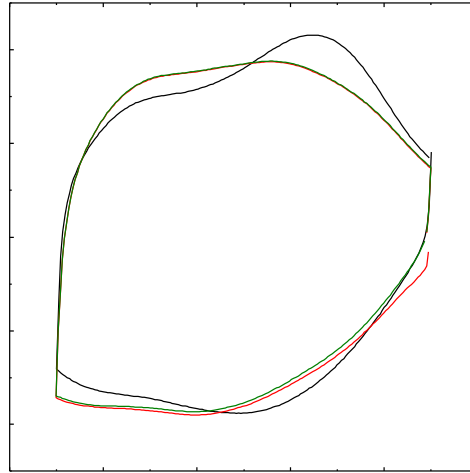

Figure 2s - Cyclic voltammograms of the first (—), second (—), and third (—) cycle of the CuHCF thin film in NaCl 1 mM electrolytic solution at pH = 1.  $\nu = 10 \text{ mV.s}^{-1}$ .

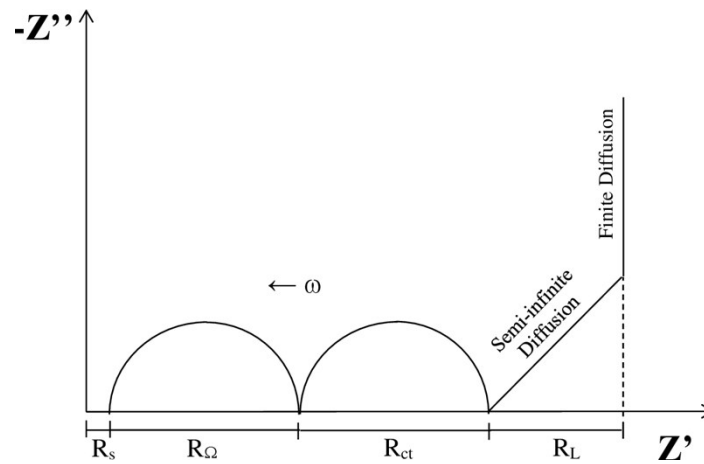

Figure 3s - Resistances determined from the intercept of the real axis ( $Z'$ ) from the Nyquist diagram.  $R_s$  is the sum of the resistances of the substrate and electrolytic solution,  $R_\Omega$  is the host matrix resistance,  $R_{ct}$  is the charge transfer resistance, and  $R_L$  is the limiting resistance.
